# Supplementary material for: Kidney histopathology in lethal human sepsis
Source: PubMed Central journal article supplement (PMC6307291; doi:10.1186/s13054-018-2287-3), 2018-12-27
Supplement: 13054_2018_2287_MOESM2_ESM.pdf [file 13054_2018_2287_MOESM2_ESM.pdf]

## **Additional file 2**

### **Kidney histopathology in lethal human sepsis: Heterogeneous damage and simultaneous repair**

**Adnan Aslan<sup>1,2</sup>, Marius C van den Heuvel<sup>3</sup>, Coen A Stegeman<sup>4</sup>, Eliane R Popa<sup>2</sup>, Annemarie M Leliveld<sup>5</sup>,  
Grietje Molema<sup>2</sup>, Jan G Zijlstra<sup>1\*</sup>, Jill Moser<sup>1,2</sup>, Matijs van Meurs<sup>1,2</sup>**

University of Groningen, University Medical Center Groningen

<sup>1</sup>Department of Critical Care

<sup>2</sup>Department of Pathology & Medical Biology, Medical Biology section

<sup>3</sup>Department of Pathology & Medical Biology, Pathology section

<sup>4</sup>Department of Nephrology

<sup>5</sup>Department of Urology

Hanzeplein 1

9700 RB Groningen, Netherlands

Correspondence: \* Jan G. Zijlstra, MD, PhD, BSc, University Medical Center Groningen,

University of Groningen, P.O. 30.001, 9700 RB Groningen, Netherlands.

E-mail: [j.g.zijlstra@umcg.nl](mailto:j.g.zijlstra@umcg.nl)

**Supplemental Table 3: Primary antibodies**

| <b>Target antigen</b> | <b>target</b>           | <b>clone</b> | <b>source</b>                             |
|-----------------------|-------------------------|--------------|-------------------------------------------|
| Neutrophil elastase   | Neutrophils             | 68672        | Abcam, Cambridge, UK                      |
| CD3                   | Pan-T-lymphocytes       | 2GV6         | Ventana Medical Systems, Tuscon, TX       |
| CD4                   | Helper T-lymphocytes    | SP35         | Ventana                                   |
| CD8                   | Cytotoxic T-lymphocytes | C8/144B      | DAKO Heverlee, BE                         |
| CD20                  | B-lymphocytes           | L-26         | Ventana                                   |
| CD68                  | Pan-macrophages         | PG-M1        | DAKO                                      |
| IRF5                  | Type I macrophages      |              | Proteintech, Manchester, UK               |
| CD163                 | Type II macrophages     | NCC-CD163    | Novacastra Reagents, Leica, Eindhoven, NL |
| $\alpha$ -SMA         | Myofibroblasts/SMC      | 1A4          | Ventana                                   |
| Ki-67                 | proliferation           | 30-9         | Ventana                                   |
| Act. caspase 3        | apoptosis               | 9661         | Cell Signaling, Danvers, MA               |

**Supplemental Table 4: Histopathological evaluation of glomeruli and tubulointerstitium**

| <b>Structure</b>                       | <b>Evaluation</b>                            |
|----------------------------------------|----------------------------------------------|
| <b>Glomeruli</b>                       |                                              |
| Total count (of all 27 patients)       | 926                                          |
| Sclerotic (absolute count; percentage) | 31 (3.35%)                                   |
| Glomerulitis                           | None                                         |
| Increase of mesangial matrix           | All stage 0                                  |
| <b>Tubulointerstitium</b>              |                                              |
| Tubulitis                              | None                                         |
| Interstitial inflammation              | 2 (both patients stage 1)                    |
| Interstitial fibrosis                  | 7 (all 7 patients stage 1)                   |
| Tubular atrophy                        | 8 (all 8 patients stage 1)                   |
| <b>Vessels</b>                         |                                              |
| Intima sclerosis                       | 20 (13 patients stage 1, 7 patients stage 2) |
| Arteriolar hyaline                     | 14 (12 patients stage 1, 2 patients stage 2) |
| Intima arteritis                       | None                                         |
| Peritubular capillaritis               | All patients stage 0                         |

### Supplemental Table 5 Presence of acute tubular necrosis

|                              | Sepsis | Control |
|------------------------------|--------|---------|
| <b>Signs of ATN (Yes/No)</b> | 24/3   | 0/12    |
| <b>Morphology</b>            |        |         |
| Stage 1                      | 4      |         |
| Stage 2                      | 18     | n.a.    |
| Stage 3                      | 2      |         |
| <b>Extensiveness</b>         |        |         |
| Stage 1                      | 19     |         |
| Stage 2                      | 2      | n.a.    |
| Stage 3                      | 2      |         |
| Stage 4                      | 1      |         |

n.a: not applicable

Figure S1

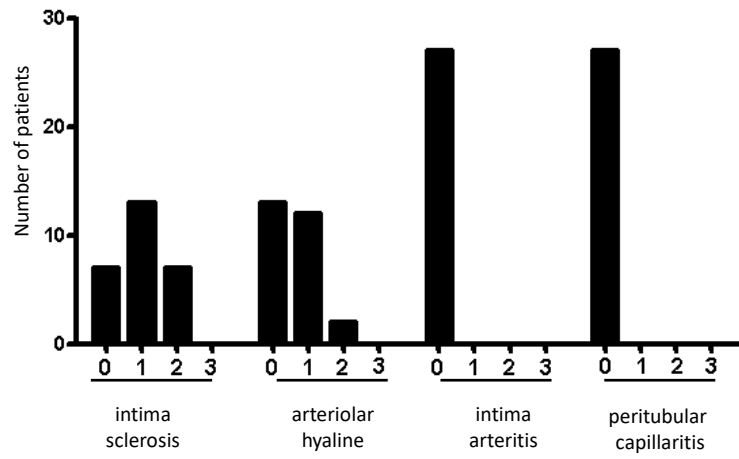

## Supplemental figure legend

### Figure S1: Vascular abnormalities

#### Intima sclerosis (%vessel lumen narrowing)

0: none; 1: -25%; 2: 25-50%; 3: >50%

#### Arteriolar hyaline

0: none, 1: small-moderate, 2: moderate-severe in multiple arteries, 3: severe in most arteries

#### Intima arteritis

0: none; 1: -25% vessel lumen narrowing; 2: >25% vessel lumen narrowing; 3: transmural arteritis, fibrinoid changes and media necrosis

#### Peritubular capillaritis

0: <10% capillaries containing inflammatory cells; 1: >10% capillaries containing 3-4 luminal cells; 2: >10% capillaries containing 5-10 luminal cells; 3: >10% capillaries containing >10 luminal cells
